# Supplementary material
Source: publisher site journal article supplement (https://www.dovepress.com/get_supplementary_file.php?f=%20405990.pdf)
Supplement: Supplementary file 1 [file get_supplementary_file.php]

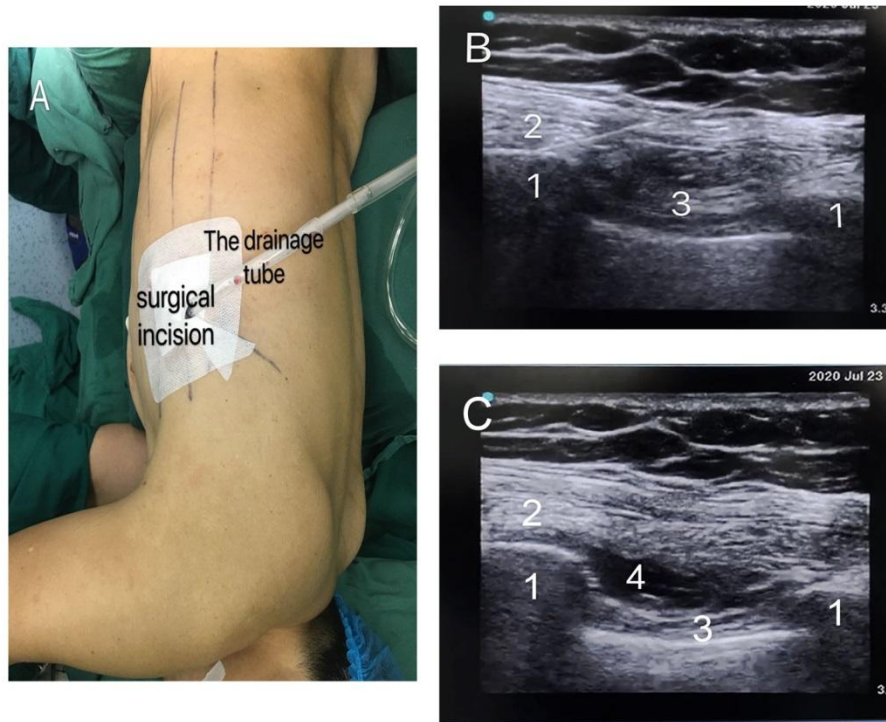

**S. Figure1.** Injection site (A) and ultrasound view of anterior serratus plane and intercostal level before (B) and after (C) administration of modified intercostal nerve block with 5 mL of ropivacaine 0.35%. 1 rib, 2 serratus anterior muscles, 3 intercostal muscles, and 4 local anesthetics. The consent to publish this image was taken from the participants.
